# Supplementary material for: Association between Ranolazine, Ischemic Preconditioning, and Cardioprotection in Patients Undergoing Scheduled Percutaneous Coronary Intervention
Source: MDPI journal article supplement (doi:10.3390/medicina60010166), 2024-01-16
Supplement: s1 [file s1]

## Suppl. Material

### Association between ranolazine, ischemic preconditioning and cardioprotection in patients undergoing scheduled percutaneous coronary intervention

**Suppl. Table S1.** Patients' data from electrocardiography, echocardiography and percutaneous coronary intervention

|                            | Control group<br>(1)<br><i>N</i> =50; 33.3%<br><b>N (%)</b> | Preconditioning group<br>(2)<br><i>N</i> =50; 33.3%<br><b>N (%)</b> | Ranolazine group<br>(3)<br><i>N</i> =50; 33.3%<br><b>N (%)</b> | <b>P</b>          |
|----------------------------|-------------------------------------------------------------|---------------------------------------------------------------------|----------------------------------------------------------------|-------------------|
| <b>Electrocardiography</b> |                                                             |                                                                     |                                                                |                   |
| Sinus Rhythm               | 47 (94.0)                                                   | 48 (96.0)                                                           | 48 (96.0)                                                      | >0.999+           |
| Atrial Fibrillation        | 2 (4.0)                                                     | 2 (4.0)                                                             | 2 (4.0)                                                        | >0.999+           |
| Left Bundle Branch Block   | 1 (2.0)                                                     | 5 (10.0)                                                            | 2 (4.1)                                                        | 0.226++           |
| QRS Width, mean (SD)       | 98.8 (19.5)                                                 | 113.5 (47.2)                                                        | 101.2 (25.7)                                                   | 0.062‡            |
| QTc, mean (SD)             | 401.2 (22.6) <sup>2,3</sup>                                 | 419 (36.5) <sup>1</sup>                                             | 421.3 (23.0) <sup>1</sup>                                      | <b>0.001‡</b>     |
| ST Before PCI              |                                                             |                                                                     |                                                                |                   |
| Normal                     | 49 (98.0)                                                   | 49 (98.0)                                                           | 48 (96.0)                                                      | >0.999++          |
| Depression                 | 1 (2.0)                                                     | 1 (2.0)                                                             | 1 (2.0)                                                        |                   |
| Elevation                  | 0 (0.0)                                                     | 0 (0.0)                                                             | 1 (2.0)                                                        |                   |
| (-) T waves                | 0 (0.0)                                                     | 0 (0.0)                                                             | 0 (0.0)                                                        |                   |
| ST after PCI               |                                                             |                                                                     |                                                                |                   |
| Normal                     | 32 (64.0)                                                   | 38 (76.0)                                                           | 41 (82.0)                                                      | 0.061++           |
| Depression                 | 13 (26.0)                                                   | 9 (18.0)                                                            | 4 (8.0)                                                        |                   |
| Elevation                  | 1 (2.0)                                                     | 3 (6.0)                                                             | 3 (6.0)                                                        |                   |
| (-) T waves                | 4 (8.0)                                                     | 0 (0.0)                                                             | 2 (4.0)                                                        |                   |
| <b>Echocardiography</b>    |                                                             |                                                                     |                                                                |                   |
| LVEF, median (IQR)         | 55 (50 – 60)                                                | 55 (45 – 60)                                                        | 55 (50 – 60)                                                   | 0.593‡            |
| LVEF≥50                    | 40 (80.0)                                                   | 32 (64.0)                                                           | 38 (76.0)                                                      | 0.170+            |
| LVIDD, median (IQR)        | 52 (49 – 54)                                                | 51 (49 – 54)                                                        | 50 (48 – 54)                                                   | 0.350‡            |
| LVIDS, median (IQR)        | 33 (31 – 37)                                                | 35 (31 – 40)                                                        | 35 (31 – 39)                                                   | 0.268‡            |
| IVSd, median (IQR)         | 12 (11 – 13)                                                | 11 (10 – 12)                                                        | 12 (9 – 13)                                                    | 0.190‡            |
| PWd, median (IQR)          | 11 (10 – 12) <sup>3</sup>                                   | 11 (10 – 12) <sup>3</sup>                                           | 10 (9 – 11) <sup>1,2</sup>                                     | <b>0.002‡</b>     |
| IVSs, median (IQR)         | 11 (10 – 12) <sup>2</sup>                                   | 12.6 (11.5 – 14) <sup>1,3</sup>                                     | 10 (9 – 11) <sup>2</sup>                                       | <b>&lt;0.001‡</b> |
| PWs, median (IQR)          | -                                                           | 18 (16 – 23)                                                        | 11 (10 – 18)                                                   | 0.071‡            |
| E/A                        |                                                             |                                                                     |                                                                |                   |

|                                 |                 |                              |                              |         |
|---------------------------------|-----------------|------------------------------|------------------------------|---------|
| <1                              | 33 (67.3)       | 32 (66.7)                    | 25 (52.1)                    | 0.218+  |
| >1                              | 16 (32.7)       | 16 (33.3)                    | 23 (47.9)                    |         |
| A (m/s), median (IQR)           | 0.8 (0.7 – 0.9) | 0.7 (0.6 – 0.8)              | 0.8 (0.7 – 0.9)              | 0.073‡  |
| Ao_root (mm), median (IQR)      | 32 (30 – 35)    | 33 (30 – 36)                 | 31 (29 – 34)                 | 0.318‡  |
| AscAo (mm), median (IQR)        | 35 (32 – 39)    | 35 (33 – 38)                 | 34 (32 – 36)                 | 0.054‡  |
| IVC (cm), median (IQR)          | -               | 1.4 (1.4 – 1.4)              | 1.2 (1.2 – 1.2)              | 0.373‡  |
| LAdiamParast (mm), median (IQR) | -               | 40.9 (35 – 42.5)             | 42 (42 – 45)                 | 0.029‡  |
| E/E', median (IQR)              | 15 (15 – 15)    | 8.7 (8 – 15)                 | 7.1 (5.2 – 9)                | 0.360‡  |
| TAPSE, median (IQR)             | -               | 12 (2.1 – 19)                | 19.5 (19 – 20)               | 0.139‡  |
| AV_Vmax (m/s), median (IQR)     | 1.3 (1.3 – 1.5) | 1.3 (1.2 – 1.4) <sup>3</sup> | 1.5 (1.3 – 1.7) <sup>2</sup> | <0.001‡ |
| TR_Vmax(m/s), median (IQR)      | -               | 2 (0.6 – 2.2)                | 2.2 (2 – 2.9)                | 0.131‡  |
| PASP (mmHg), median (IQR)       | -               | 24 (18.9 – 29)               | 19 (15 – 23)                 | 0.217‡  |
|                                 |                 |                              |                              |         |
| <b>PCI characteristics</b>      |                 |                              |                              |         |
| Previous PCI                    | 25 (50.0)       | 21 (42.0)                    | 29 (58.0)                    | 0.278+  |
| Access point                    |                 |                              |                              |         |
| Left upper limb                 | 9 (18.0)        | 6 (12.2)                     | 14 (28.0)                    | 0.134+  |
| Right upper limb                | 41 (82.0)       | 43 (87.8)                    | 36 (72.0)                    |         |
| Chest pain during PCI           | 27 (54.0)       | 19 (38.0)                    | 25 (50.0)                    | 0.249+  |
| Complications                   | 7 (14.6)        | 9 (18.0)                     | 8 (16.0)                     | 0.899+  |

+Pearson's chi-square test; ++Fisher's exact test; ‡ANOVA; ‡‡Kruskal-Wallis test

1,2,3 significant differences after Bonferroni correction

**Abbreviations:** LVEF, Left Ventricular Ejection Fraction; LVIDD, Left Ventricular Internal Diameter in Diastole; LVIDS, Left Ventricular Internal Diameter in Systole; IVSd, Interventricular septum diameter in diastole; IVSs, Interventricular septum diameter in systole; PWd, Posterior wall diameter in diastole; PWs, Posterior wall diameter in systole; Ao\_root, Aortic root; AscAo, Ascending aorta; IVC, Inferior Vena Cava; LAdiamParast, Left Atrial diameter parasternal view; PCI, Percutaneous Coronary Intervention; TAPSE, Tricuspid Annular Plane Systolic Excursion; AV, Aortic valve; TR, Tricuspid regurgitation; PASP, Pulmonary Artery Systolic Pressure; DES, Drug Eluting Stent; PCI, Percutaneous Coronary Intervention.

**Suppl. Table S2.** Patients' medical treatment

|                                             | Control group<br>(1)   | Preconditioning group<br>(2) | Ranolizine group<br>(3)  | P             |
|---------------------------------------------|------------------------|------------------------------|--------------------------|---------------|
|                                             | N=50; 33.3%            | N=50; 33.3%                  | N=50; 33.3%              |               |
|                                             | N (%)                  | N (%)                        | N (%)                    |               |
| Nitrates during PCI                         | 1 (2.0) <sup>3</sup>   | 6 (12.0) <sup>3</sup>        | 48 (96.0) <sup>1,2</sup> | <0.001+       |
| Nitrates after PCI                          | 8 (16.0)               | 7 (14.0)                     | 13 (26.0)                | 0.256+        |
| Nitrates before PCI                         | 49 (98.0) <sup>3</sup> | 50 (100.0) <sup>3</sup>      | 8 (16.0) <sup>1,2</sup>  | <0.001+       |
| Ezetimibe                                   | 5 (10.0)               | 5 (10.0)                     | 10 (20.4)                | 0.216+        |
| Fenofibrate                                 | 2 (4.0)                | 1 (2.0)                      | 1 (2.0)                  | >0.999++      |
| Calcium Chanel Blockers                     | 10 (20.0)              | 17 (34.0)                    | 18 (36.7)                | 0.149+        |
| Ivabradine                                  | 2 (4.0)                | 3 (6.0)                      | 2 (4.1)                  | >0.999++      |
| Digitalis                                   | 0 (0.0)                | 1 (2.0)                      | 0 (0.0)                  | >0.999++      |
| Sacubitril/Valsartan                        | 0 (0.0)                | 1 (2.0)                      | 0 (0.0)                  | >0.999++      |
| Angiotensin-converting<br>enzyme inhibitors | 17 (34.0)              | 11 (22.0)                    | 13 (26.5)                | 0.398+        |
| Angiotensin receptor<br>blockers            | 20 (40.0)              | 23 (46.0)                    | 26 (53.1)                | 0.427+        |
| B-Blocker                                   | 33 (67.3)              | 36 (72.0)                    | 41 (83.7)                | 0.162+        |
| Mineralocorticoid receptor<br>antagonist    | 2 (4.0)                | 3 (6.0)                      | 4 (8.2)                  | 0.640++       |
| Diuretics                                   | 11 (22.0) <sup>2</sup> | 24 (48.0) <sup>1</sup>       | 19 (38.0)                | <b>0.024+</b> |
| Furosemide                                  | 4 (8.0)                | 8 (16.0)                     | 8 (16.0)                 | 0.397+        |
| Hydrochlorothiazide                         | 8 (16.0)               | 15 (30.0)                    | 13 (26.0)                | 0.240+        |
| Indapamide                                  | 1 (2.0)                | 1 (2.0)                      | 1 (2.0)                  | >0.999++      |

+Pearson's chi-square test; ++Fisher's exact test;

1,2,3 significant differences after Bonferroni correction

**Suppl. Table S3.** Changes in SGOT, LDH, CRP, CPK and CK-MB by group

|                   | Control group<br>(1) |                                   | Preconditioning group<br>(2) |                                 | Ranolizine group<br>(3) |                                 | P++          |
|-------------------|----------------------|-----------------------------------|------------------------------|---------------------------------|-------------------------|---------------------------------|--------------|
|                   | Mean (SD)            | Median (IQR)                      | Mean (SD)                    | Median (IQR)                    | Mean (SD)               | Median (IQR)                    |              |
| <b>SGOT</b>       |                      |                                   |                              |                                 |                         |                                 |              |
| <i>Before PCI</i> | 19.4 (4.87)          | 20 (16 – 22)                      | 20.62 (6.01)                 | 19 (17 – 24)                    | 21.34 (5.79)            | 20 (17 – 26)                    | 0.270        |
| <i>4 hours</i>    | 23.06 (6.21)         | 22 (18 – 26)                      | 25.55 (10.95)                | 22 (18 – 30)                    | 25.84 (8.78)            | 23 (20 – 30)                    | 0.304        |
| <i>10 hours</i>   | 28.72 (15.29)        | 23.5 (21 – 31)                    | 31.84 (20.39)                | 24 (20 – 35)                    | 30.46 (10.79)           | 28.5 (22 – 39)                  | 0.352        |
| <i>24 hours</i>   | 27.06 (14.48)        | 22 (19 – 29)                      | 30.59 (19.47)                | 22 (18 – 34)                    | 28.96 (14.22)           | 28 (18 – 34)                    | 0.643        |
| <i>P+</i>         | <0.001               |                                   | <0.001                       |                                 | <0.001                  |                                 |              |
| <b>LDH</b>        |                      |                                   |                              |                                 |                         |                                 |              |
| <i>Before PCI</i> | 141.56<br>(36.05)    | 138.5 (128 –<br>158) <sup>3</sup> | 157.38<br>(28.19)            | 150.5 (139 –<br>180)            | 160.52<br>(29.28)       | 153 (138 –<br>177) <sup>1</sup> | <b>0.027</b> |
| <i>4 hours</i>    | 159.54<br>(40.59)    | 156 (134 – 188) <sup>2</sup>      | 182.64<br>(43.11)            | 175 (148 –<br>207) <sup>1</sup> | 176.08<br>(39.31)       | 164.5 (149 –<br>192)            | <b>0.027</b> |
| <i>10 hours</i>   | 173.03 (49.9)        | 164.5 (138 – 205)                 | 201.49<br>(114.73)           | 174 (159 – 215)                 | 191.7 (62.9)            | 179.5 (160 –<br>199)            | 0.084        |
| <i>24 hours</i>   | 162.54<br>(43.71)    | 158.5 (136 – 192)                 | 173.22<br>(54.32)            | 160 (142 – 202)                 | 171.1 (31.67)           | 169.5 (150 –<br>185)            | 0.318        |
| <i>P+</i>         | <0.001               |                                   | <0.001                       |                                 | <0.001                  |                                 |              |
| <b>CRP</b>        |                      |                                   |                              |                                 |                         |                                 |              |
| <i>Before PCI</i> | 1.52 (1.24)          | 1.12 (0.64 – 2.1)                 | 2.15 (2.15)                  | 1.29 (0.67 –<br>3.2)            | 1.9 (2.19)              | 1.3 (0.65 –<br>2.21)            | 0.410        |
| <i>4 hours</i>    | 2.13 (1.64)          | 1.83 (0.86 – 2.94)                | 3.07 (3.01)                  | 1.92 (1.14 –<br>3.81)           | 2.38 (2.23)             | 1.62 (1.04 –<br>2.9)            | 0.185        |
| <i>10 hours</i>   | 2.55 (1.59)          | 2.19 (1.22 – 3.65)                | 4.14 (4.66)                  | 2.53 (1.77 –<br>5.58)           | 3.26 (3.35)             | 2.31 (1.39 –<br>3.65)           | 0.246        |
| <i>24 hours</i>   | 3.14 (1.9)           | 2.66 (1.63 – 4.32)                | 5.5 (7.48)                   | 3.61 (2.39 –<br>5.04)           | 3.64 (3.13)             | 2.95 (1.91 –<br>3.99)           | 0.183        |
| <i>P+</i>         | <0.001               |                                   | <0.001                       |                                 | <0.001                  |                                 |              |
| <b>CPK</b>        |                      |                                   |                              |                                 |                         |                                 |              |
| <i>Before PCI</i> | 79.24 (34.69)        | 81 (51 – 95)                      | 94.38 (58.89)                | 79 (54 – 107) <sup>3</sup>      | 69.25 (29.77)           | 63.5 (52 – 81) <sup>2</sup>     | <b>0.024</b> |
| <i>4 hours</i>    | 99.5 (45.95)         | 94 (62 – 121)                     | 116.45 (66.84)               | 102 (71 – 137) <sup>3</sup>     | 86.47 (48.84)           | 73.5 (61 – 97) <sup>2</sup>     | <b>0.025</b> |
| <i>10 hours</i>   | 142.08<br>(105.15)   | 111.5 (87 – 165) <sup>3</sup>     | 141.41 (84.97)               | 117 (85 – 177) <sup>3</sup>     | 102.81 (61.38)          | 85.5 (70 – 108) <sup>1,2</sup>  | <b>0.012</b> |
| <i>24 hours</i>   | 130.5 (88.23)        | 105 (69 – 160)                    | 148.14 (120.4)               | 108 (81 – 180)                  | 115.12<br>(123.42)      | 82.5 (71 – 109)                 | 0.068        |
| <i>P+</i>         | <0.001               |                                   | <0.001                       |                                 | <0.001                  |                                 |              |
| <b>CK-MB</b>      |                      |                                   |                              |                                 |                         |                                 |              |
| <i>Before PCI</i> | 0.93 (3.2)           | 0.5 (0.2 – 0.7)                   | 0.83 (0.96)                  | 0.6 (0.4 – 0.8)                 | 0.54 (0.73)             | 0.4 (0.3 – 0.6)                 | 0.133        |

|          |              |                              |             |                 |             |                              |              |
|----------|--------------|------------------------------|-------------|-----------------|-------------|------------------------------|--------------|
| 4 hours  | 1.53 (2.52)  | 0.85 (0.5 – 1.4)             | 1.88 (2.25) | 1 (0.7 – 2.4)   | 1.39 (2.55) | 0.8 (0.5 – 0.9)              | 0.104        |
| 10 hours | 6.46 (10.99) | 1.7 (0.8 – 6.7) <sup>3</sup> | 5.7 (11.51) | 1.7 (0.9 – 6)   | 2.59 (4.54) | 1.1 (0.8 – 1.9) <sup>1</sup> | <b>0.047</b> |
| 24 hours | 5.18 (7.93)  | 1.55 (0.9 – 5.9)             | 4.91 (8.55) | 1.8 (0.9 – 5.9) | 3.8 (10.46) | 0.95 (0.7 – 2.1)             | 0.123        |
| P+       | <0.001       |                              | <0.001      |                 | <0.001      |                              |              |

+p-value for time comparisons (after logarithmic transformation)

++p-value for group comparisons (after logarithmic transformation)

1,2,3 significant differences after Bonferroni correction

**Abbreviations:** SGOT, serum glutamic-oxaloacetic transaminase; LDH, Lactate Dehydrogenase; CRP, C reactive Protein; CPK, Creatinine Phosphokinase.

**Suppl. Table S4.** Multiple linear regression results for changes in troponin in a stepwise method

|                                            |                     | $\beta$ + | SE++  | P                |
|--------------------------------------------|---------------------|-----------|-------|------------------|
| Group                                      | Control (reference) |           |       |                  |
|                                            | Preconditioning     | -0.008    | 0.038 | 0.839            |
|                                            | Ranolazine          | -0.073    | 0.037 | <b>0.050</b>     |
| Gender                                     | Men (reference)     |           |       |                  |
|                                            | Women               | 0.142     | 0.038 | <b>&lt;0.001</b> |
| Change SGOT (from pre-PCI until 24 hours)  |                     | 0.009     | 0.002 | <b>&lt;0.001</b> |
| Change CK-MB (from pre-PCI until 24 hours) |                     | 0.013     | 0.003 | <b>&lt;0.001</b> |

*Note.* Regression was conducted after logarithmic transformation of the dependent variable

+regression coefficient ++Standard Error
